# Supplementary material
Source: ML conference proceedings conference paper supplement (https://openreview.net/forum?id=YgudIlQ9nC)

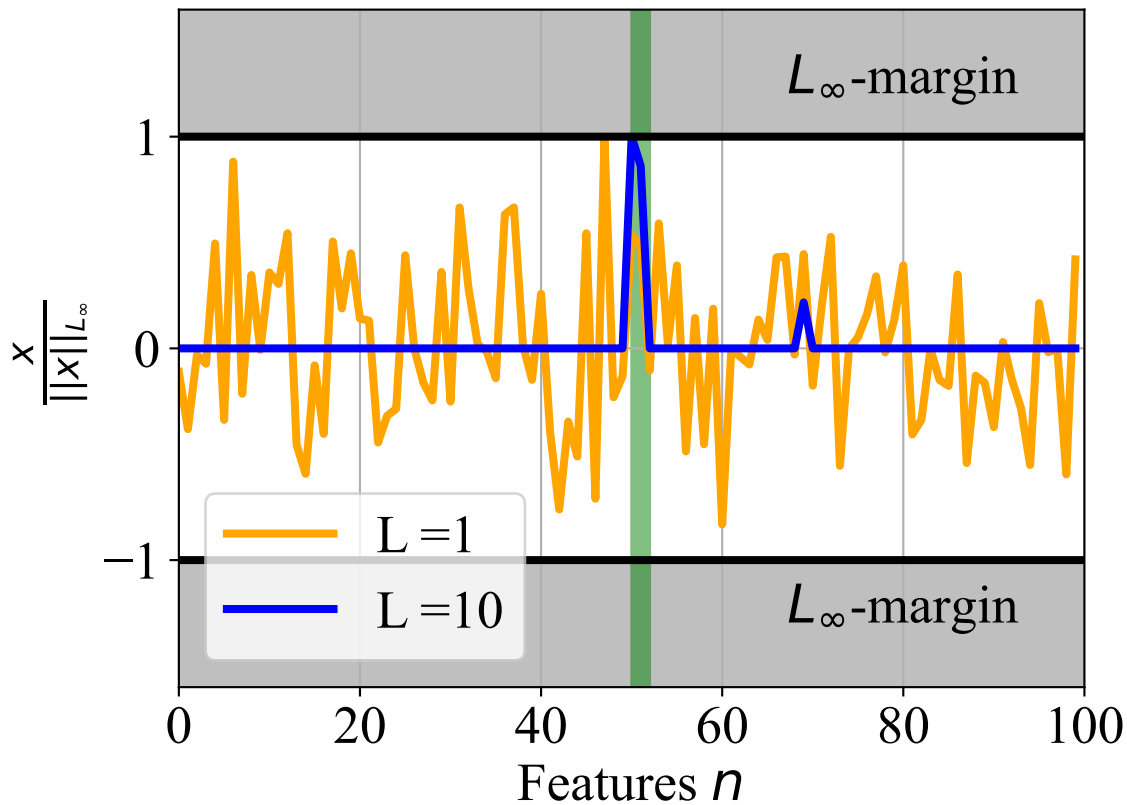

Supplement: supplementary_material [file marginadam.pdf › Codes/DiagLinNet/MarginExp/marginadam.pdf]

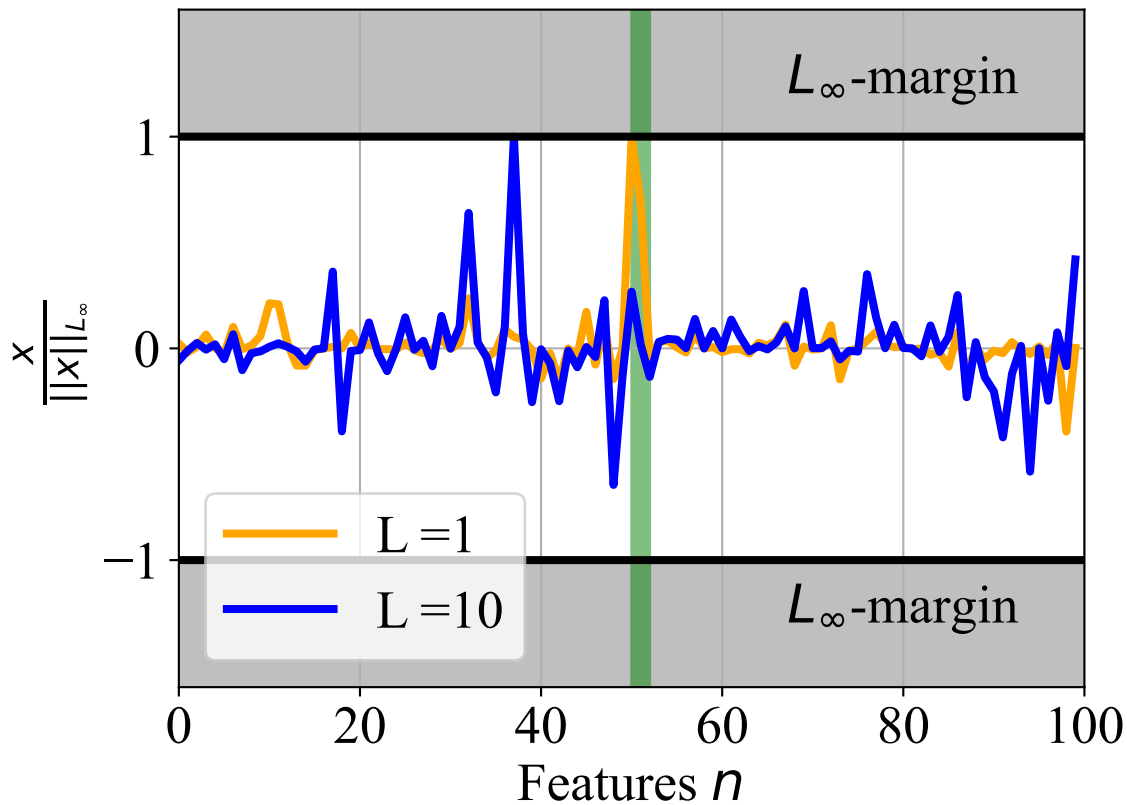

Supplement: supplementary_material [file margingd.pdf › Codes/DiagLinNet/MarginExp/margingd.pdf]

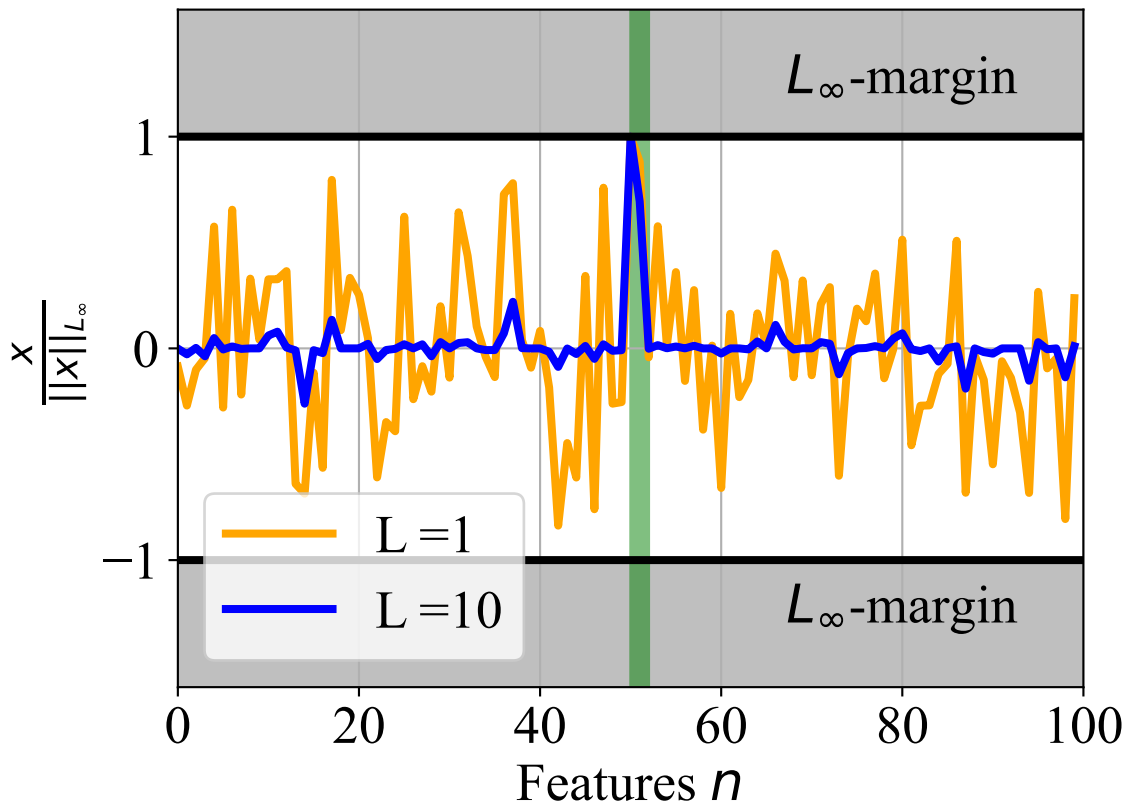

Supplement: supplementary_material [file marginsign.pdf › Codes/DiagLinNet/MarginExp/marginsign.pdf]

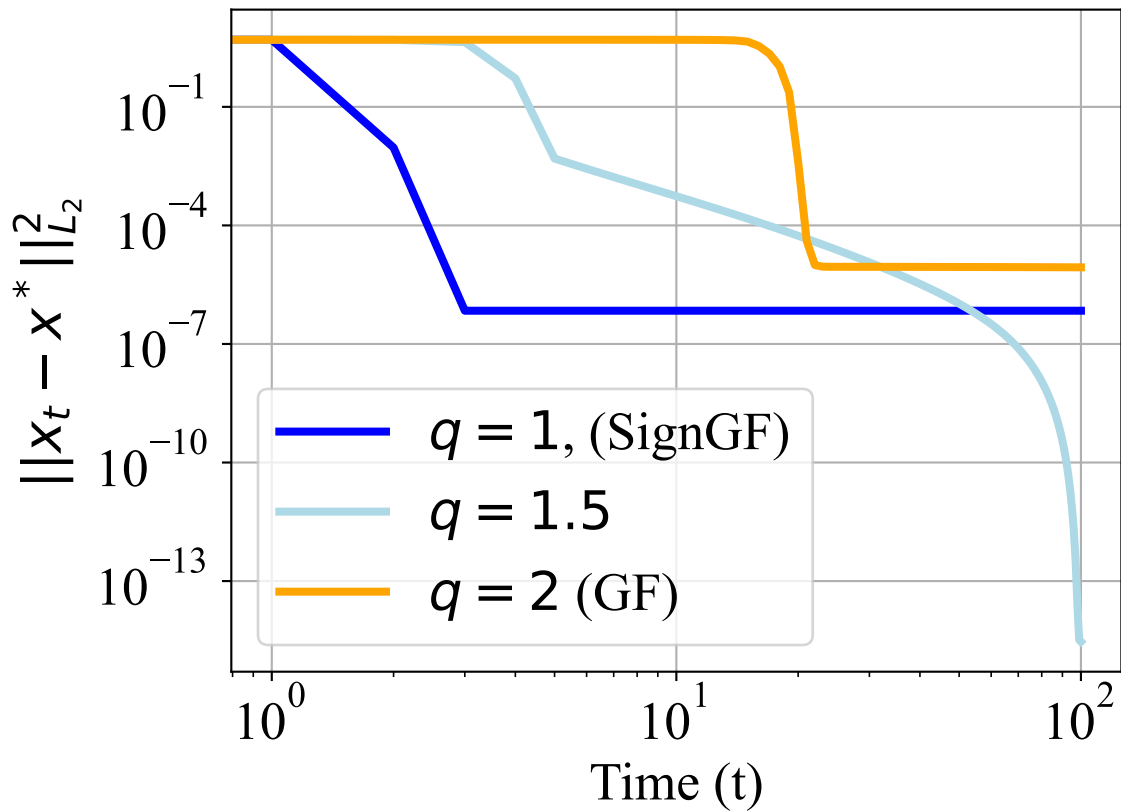

Supplement: supplementary_material [file SaddleEscape.pdf › Codes/DiagLinNet/SaddleEscape.pdf]

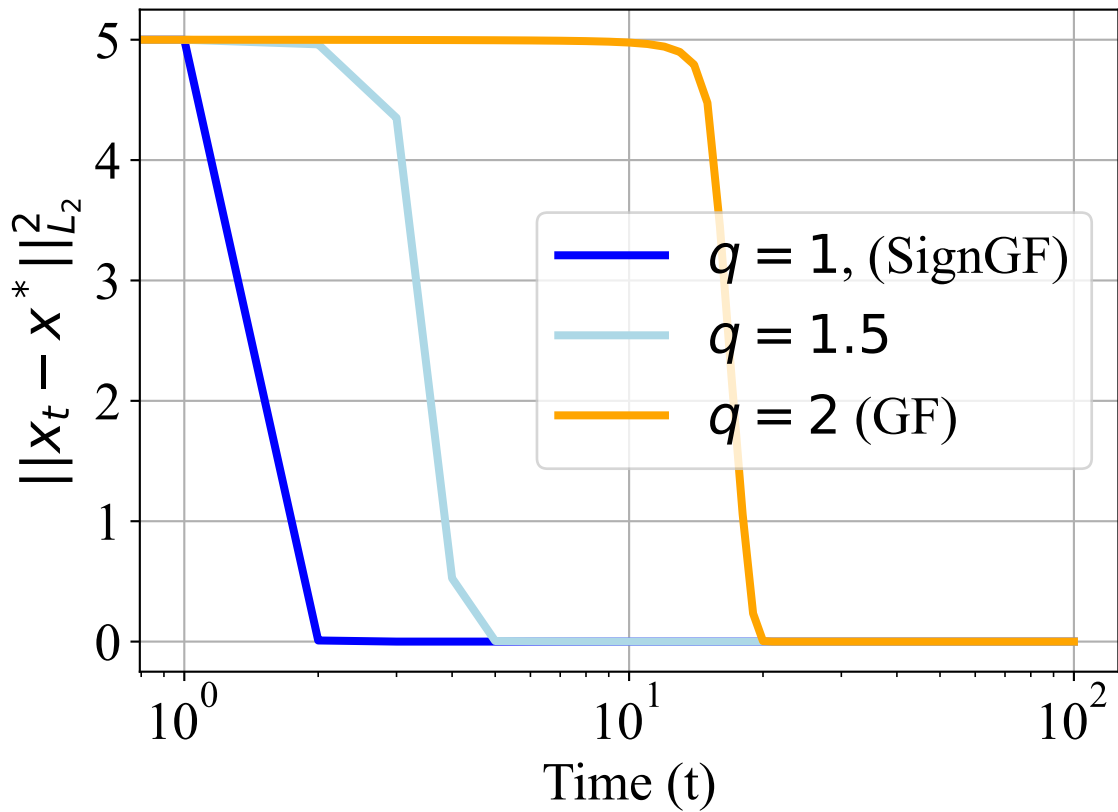

Supplement: supplementary_material [file SaddleEscapenology.pdf › Codes/DiagLinNet/SaddleEscapenology.pdf]

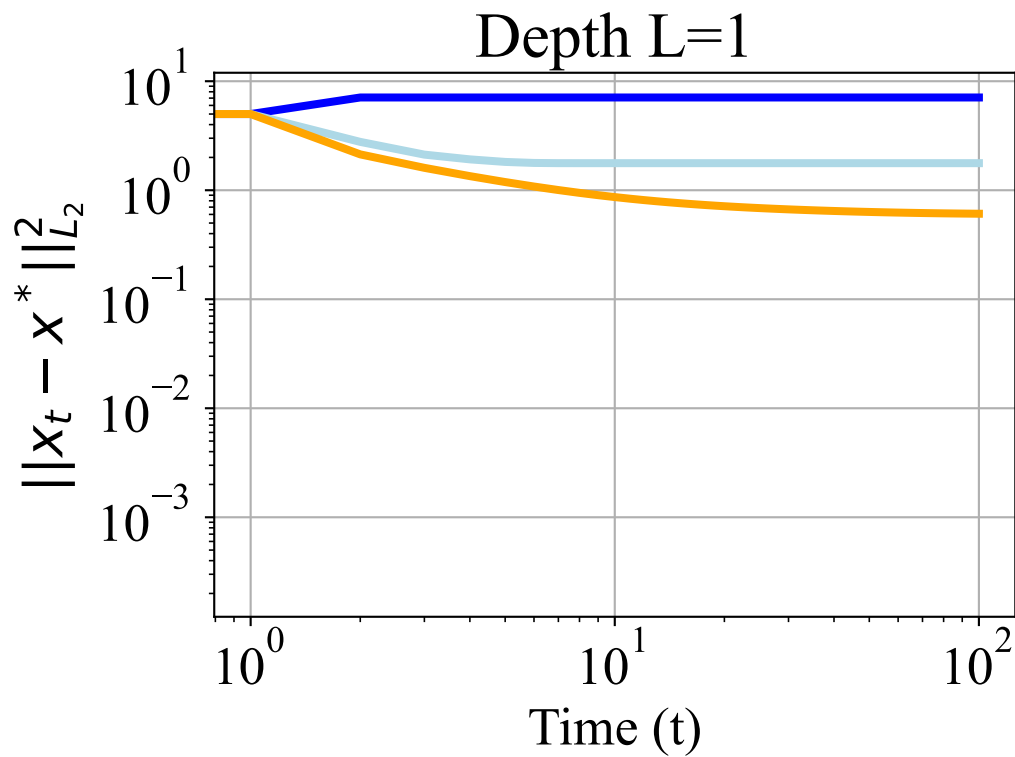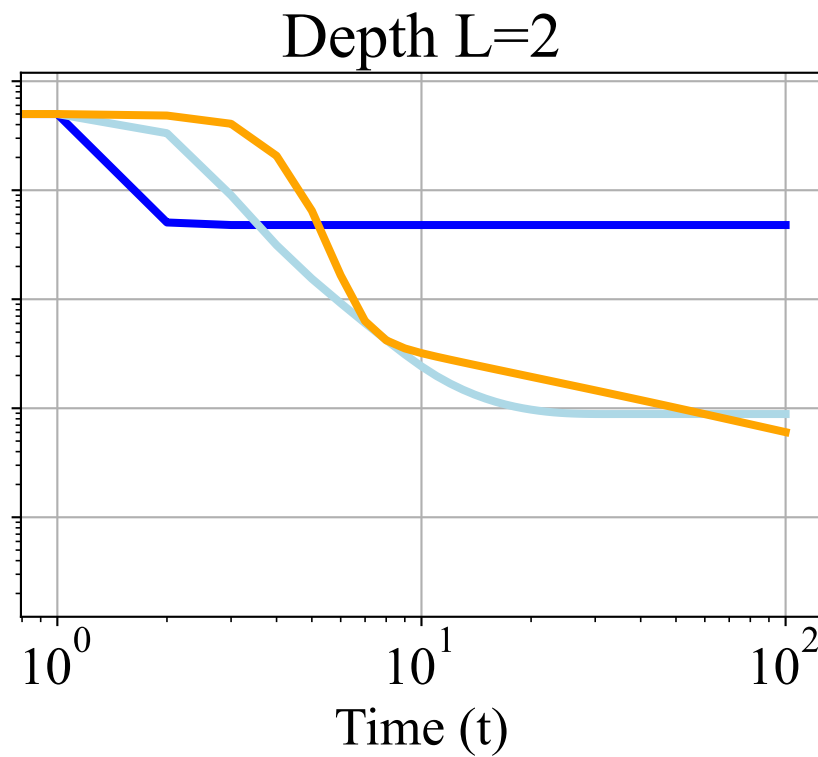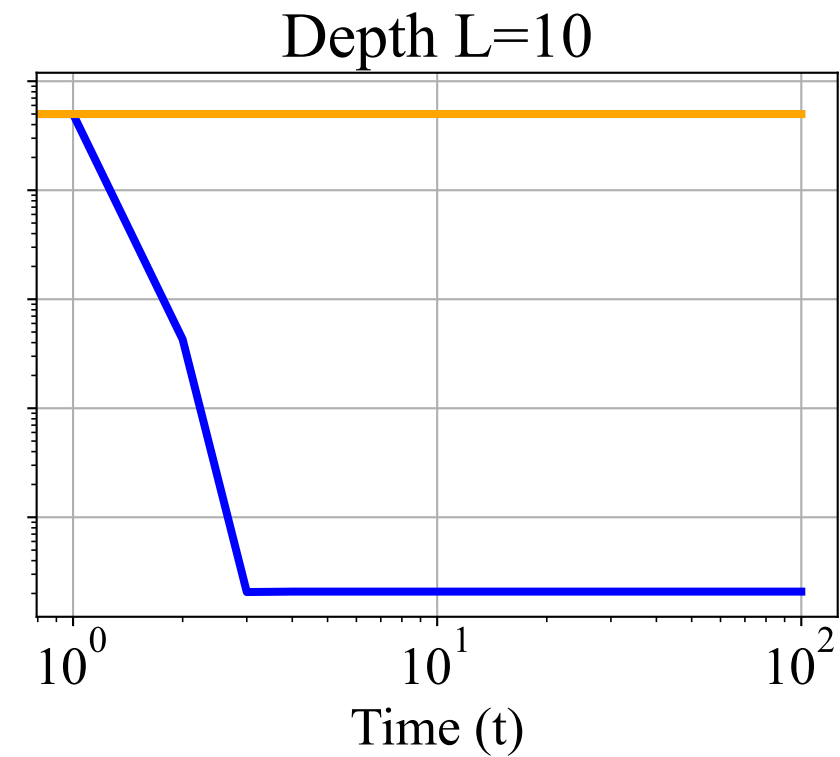

—  $q = 1$ , (SignGF)    —  $q = 1.5$     —  $q = 2$  (GF)

Supplement: supplementary_material [file generalizationundetermined.pdf › Codes/DiagLinNet/generalizationundetermined.pdf]

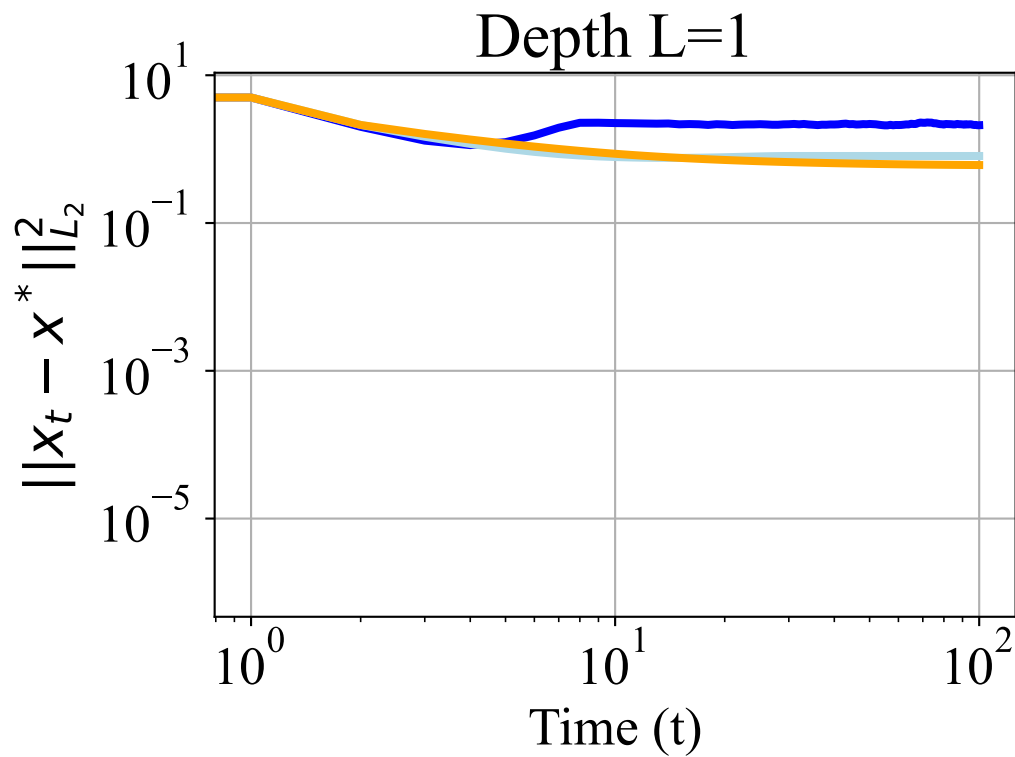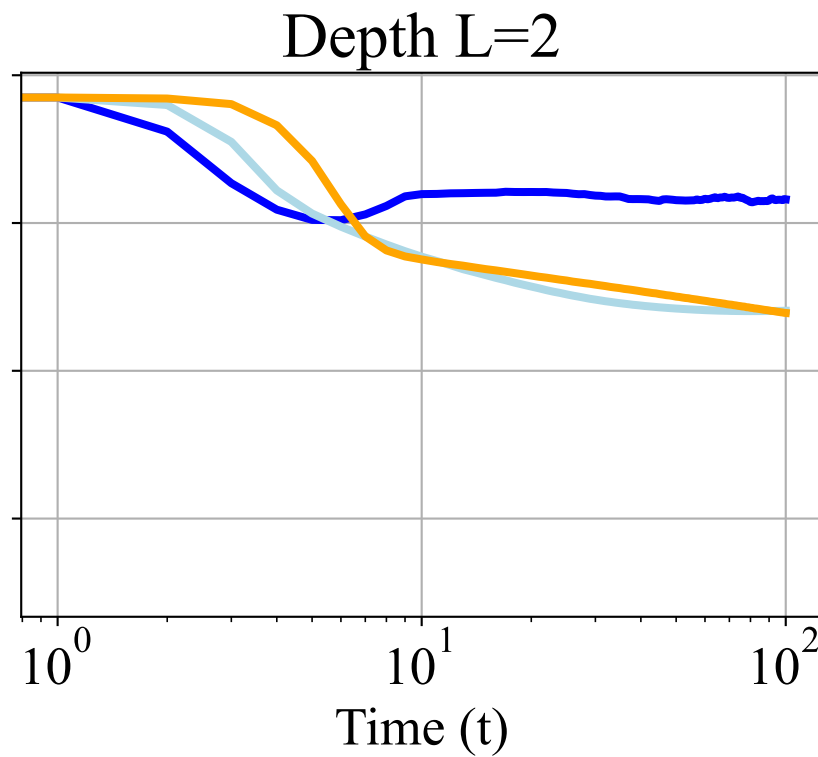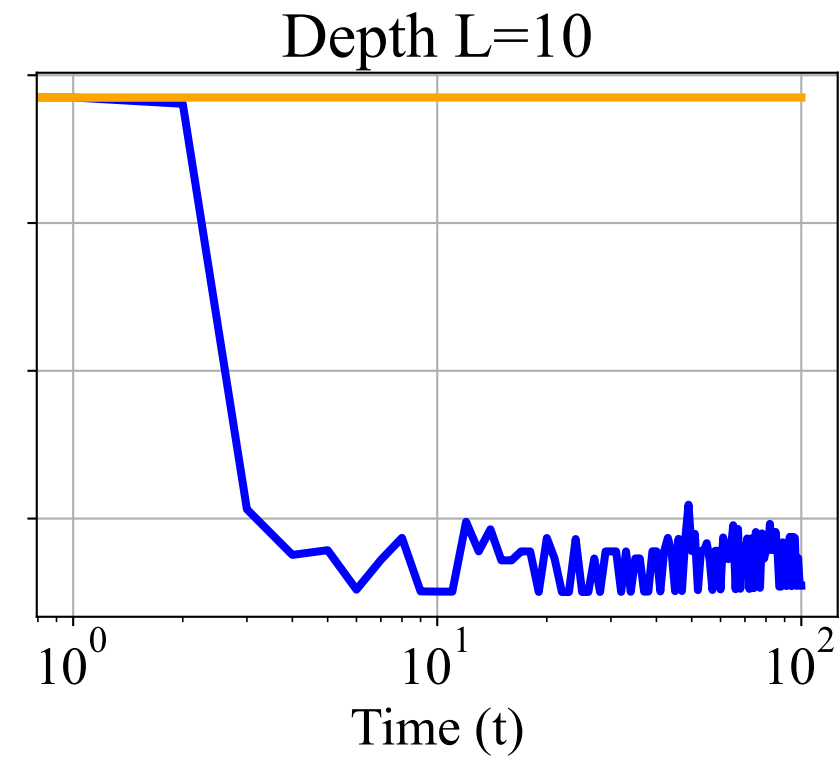

—  $q = 1$ , (SignGF)    —  $q = 1.5$     —  $q = 2$  (GF)

Supplement: supplementary_material [file generalizationundeterminedbs5.pdf › Codes/DiagLinNet/generalizationundeterminedbs5.pdf]

Depth L=1

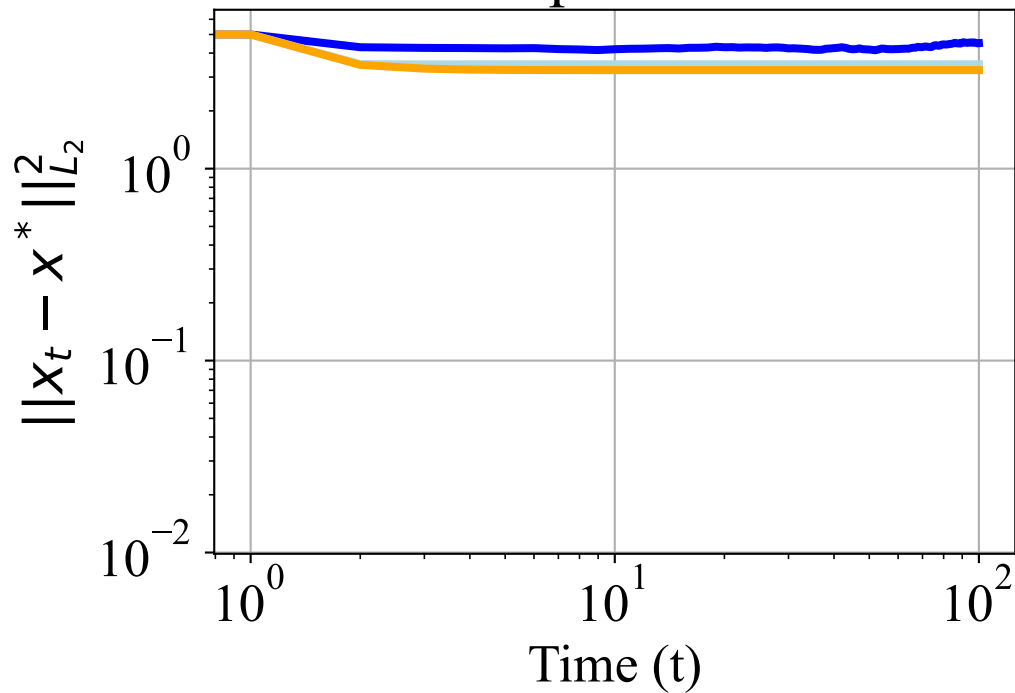

Depth L=2

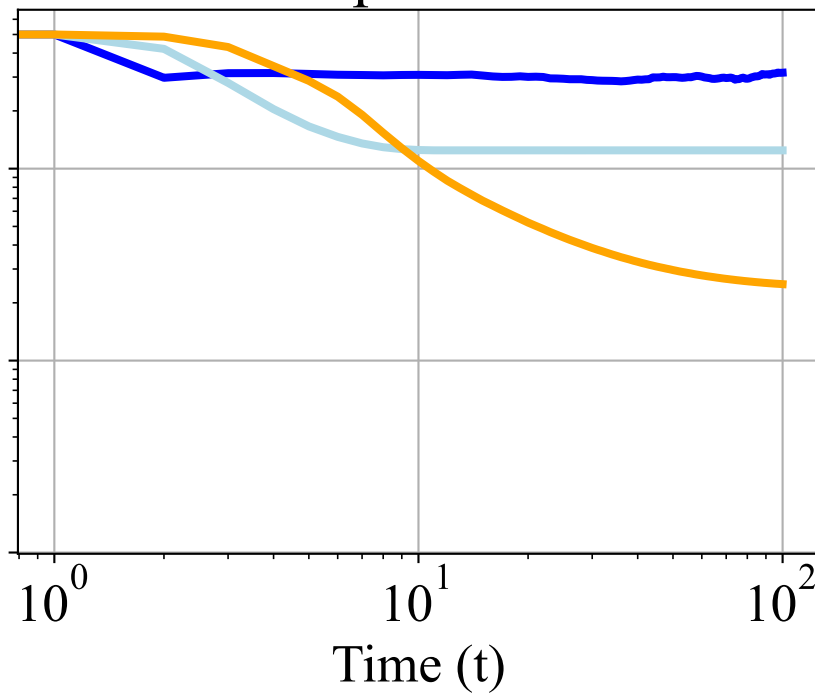

Depth L=10

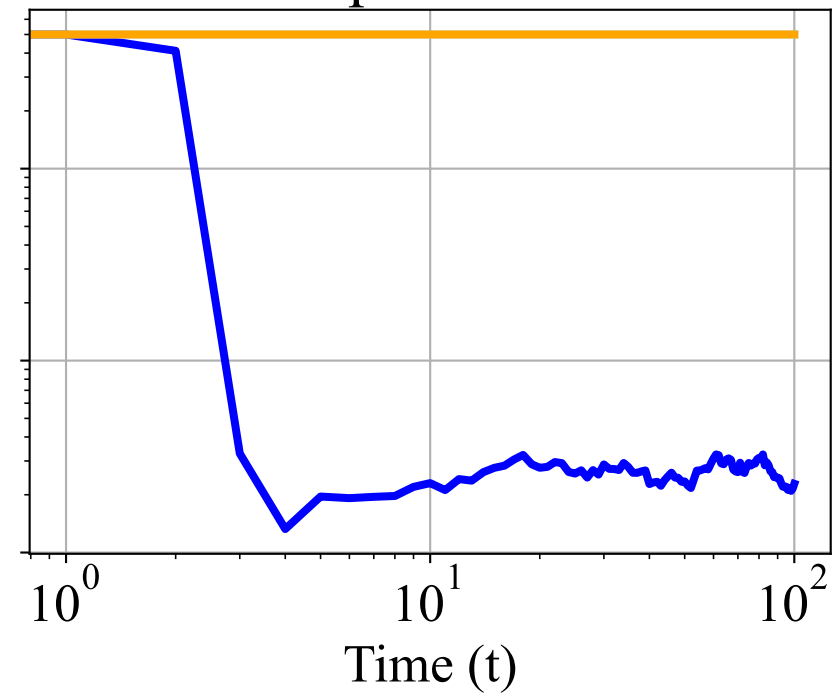

—  $q = 1$ , (SignGF)    —  $q = 1.5$     —  $q = 2$  (GF)

Supplement: supplementary_material [file generalizationundeterminedbs5lessdata40.pdf › Codes/DiagLinNet/generalizationundeterminedbs5lessdata40.pdf]

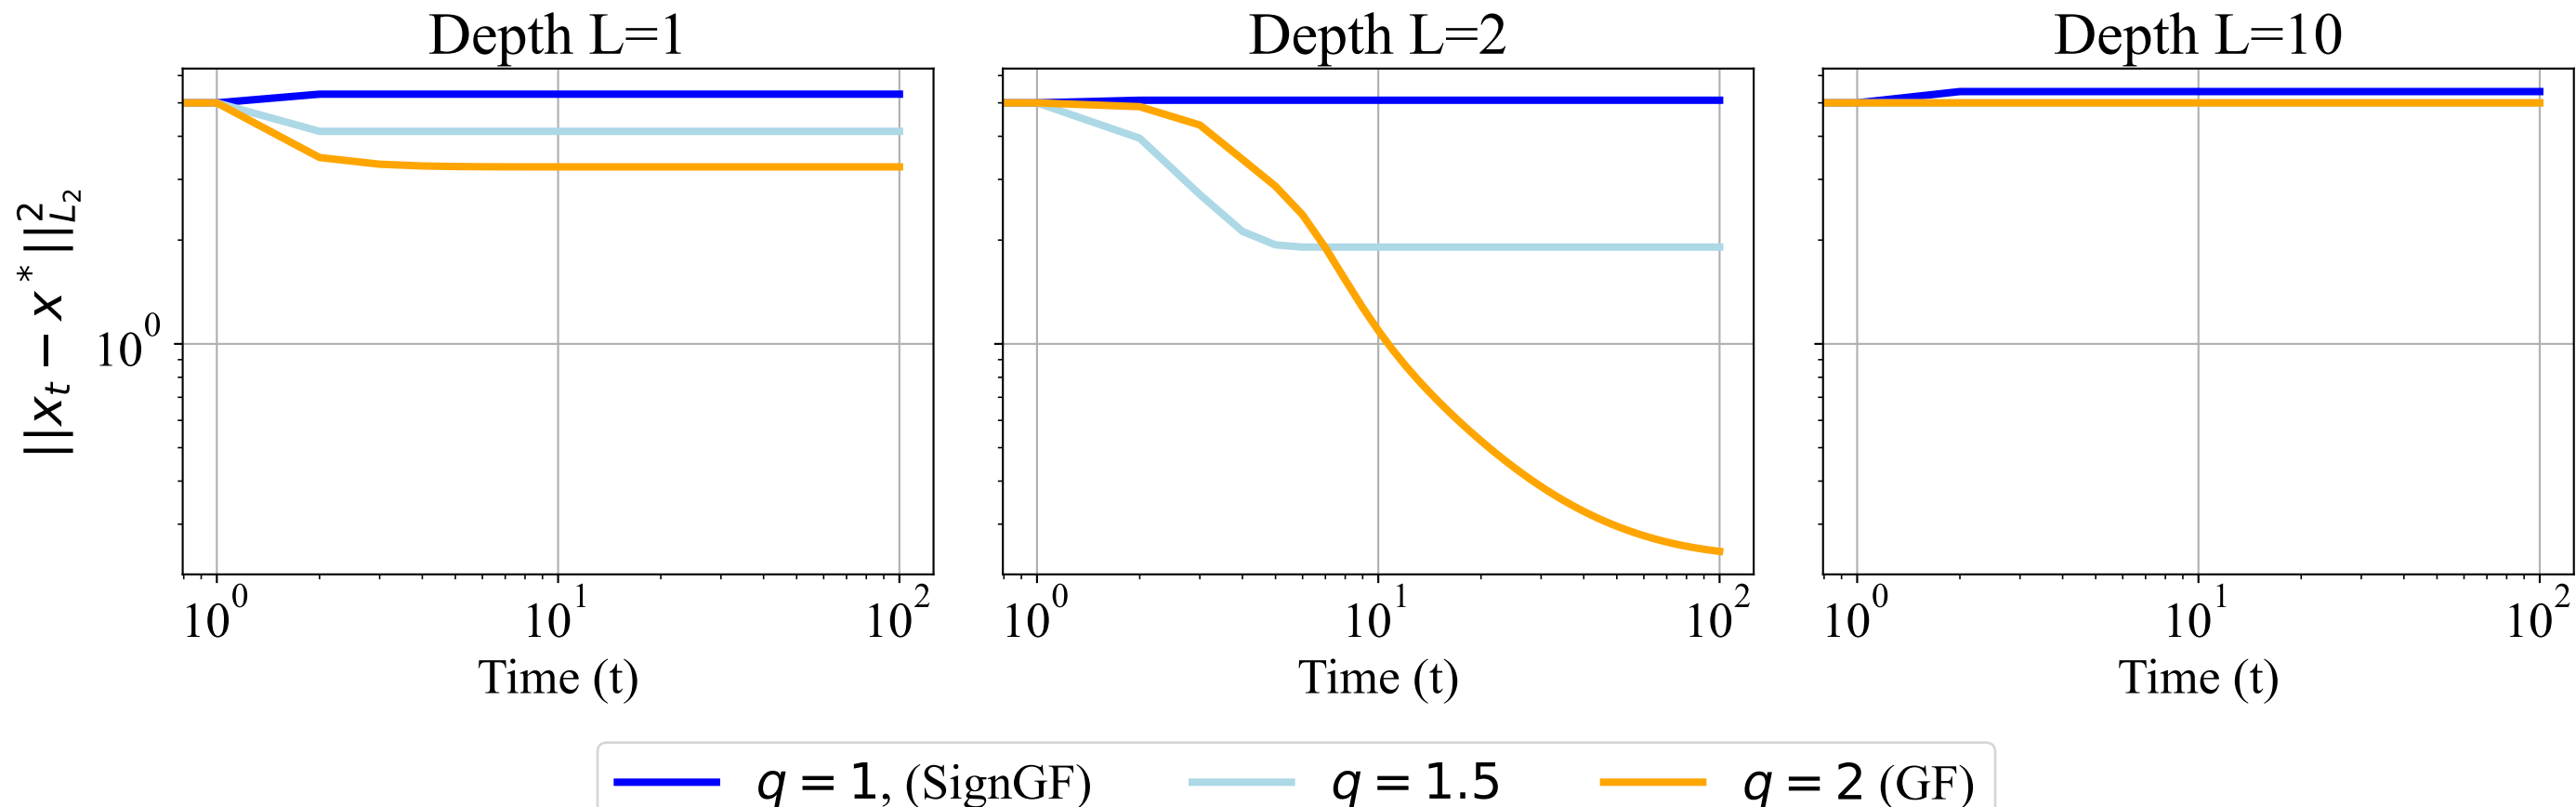

Supplement: supplementary_material [file generalizationundeterminedbsfulllessdata40.pdf › Codes/DiagLinNet/generalizationundeterminedbsfulllessdata40.pdf]

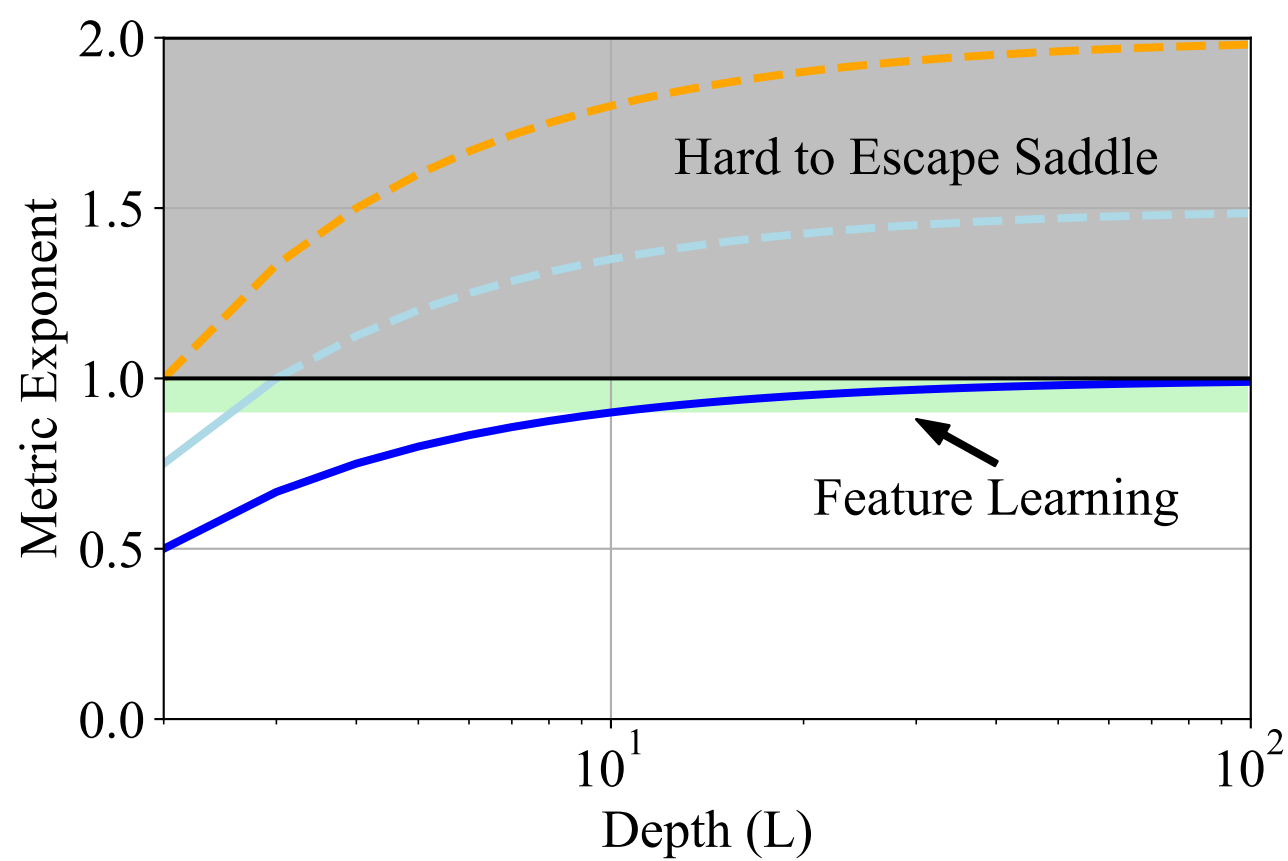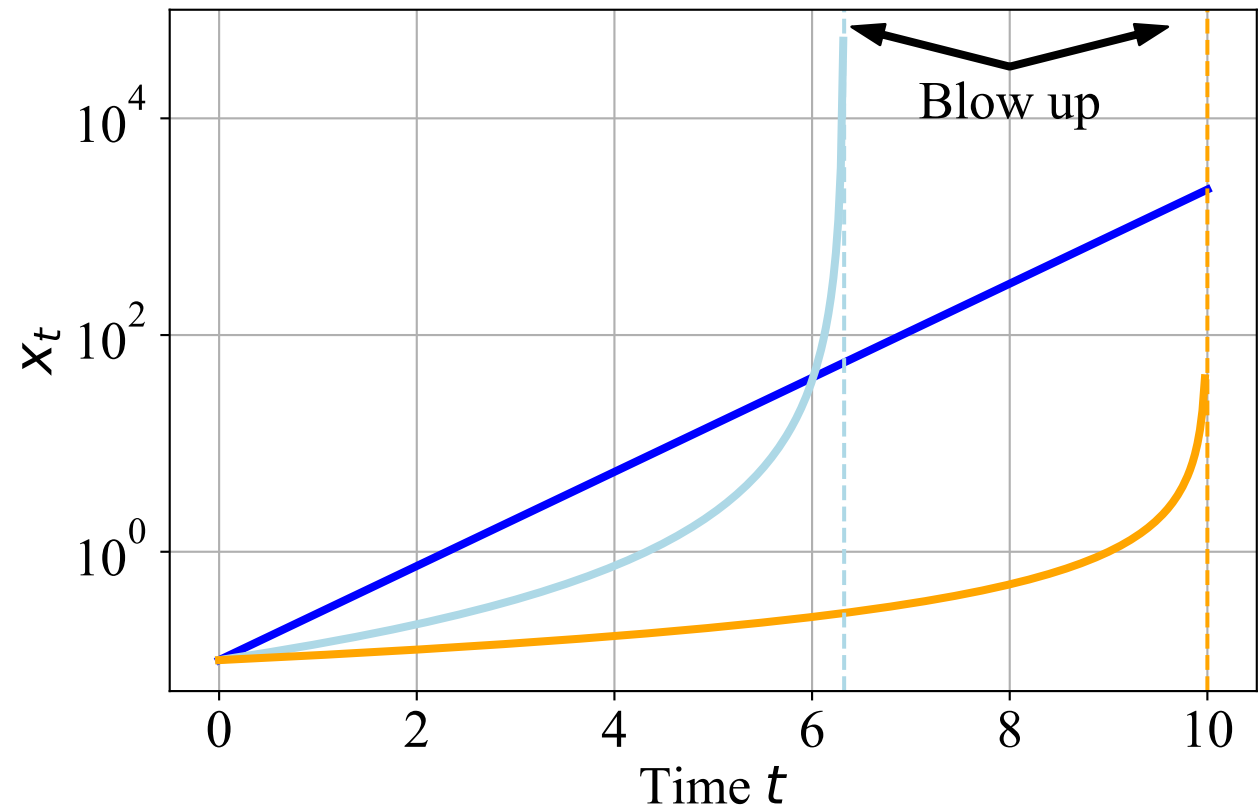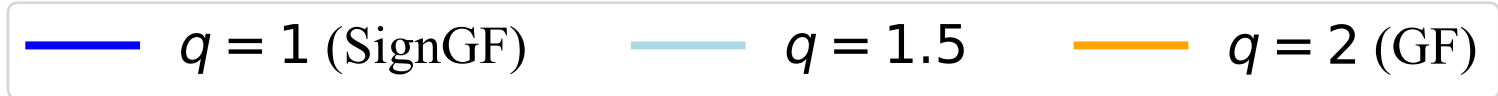

Supplement: supplementary_material [file Mainfigure.pdf › Codes/Plots/Mainfigure.pdf]
